# Supplementary material for: The NASA Eulerian Snow on Sea Ice Model (NESOSIM): Initial modeldevelopment and analysis
Source: Copernicus journal article supplement (doi:10.5194/gmd-2018-84), 2018-05-07
Supplement: Supplementary file 1 [file gmd-2018-84-supplement.pdf]

# Supplementary Information: The NASA Eulerian Snow on Sea Ice Model (NESOSIM): Initial model development and analysis

Alek A. Petty<sup>1,2</sup>, Melinda Webster<sup>1</sup>, Linette Boisvert<sup>1,2</sup>, Thorsten Markus<sup>1</sup>

<sup>1</sup> Cryospheric Sciences Laboratory, NASA Goddard Space Flight Center, Greenbelt, MD, USA.

<sup>2</sup> Earth System Science Interdisciplinary Center, University of Maryland, College Park, MD, USA.

Correspondence to: Alek A. Petty (alek.a.petty@nasa.gov)

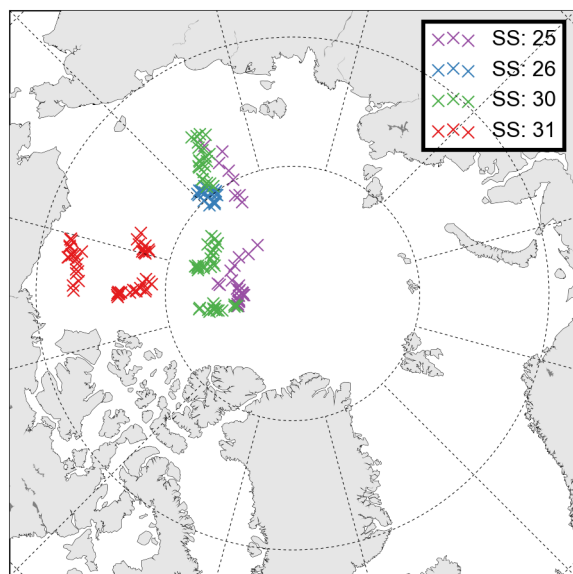

**Figure S1:** Map of the drifting Soviet station data used in this study. The number indicates the respective station number.

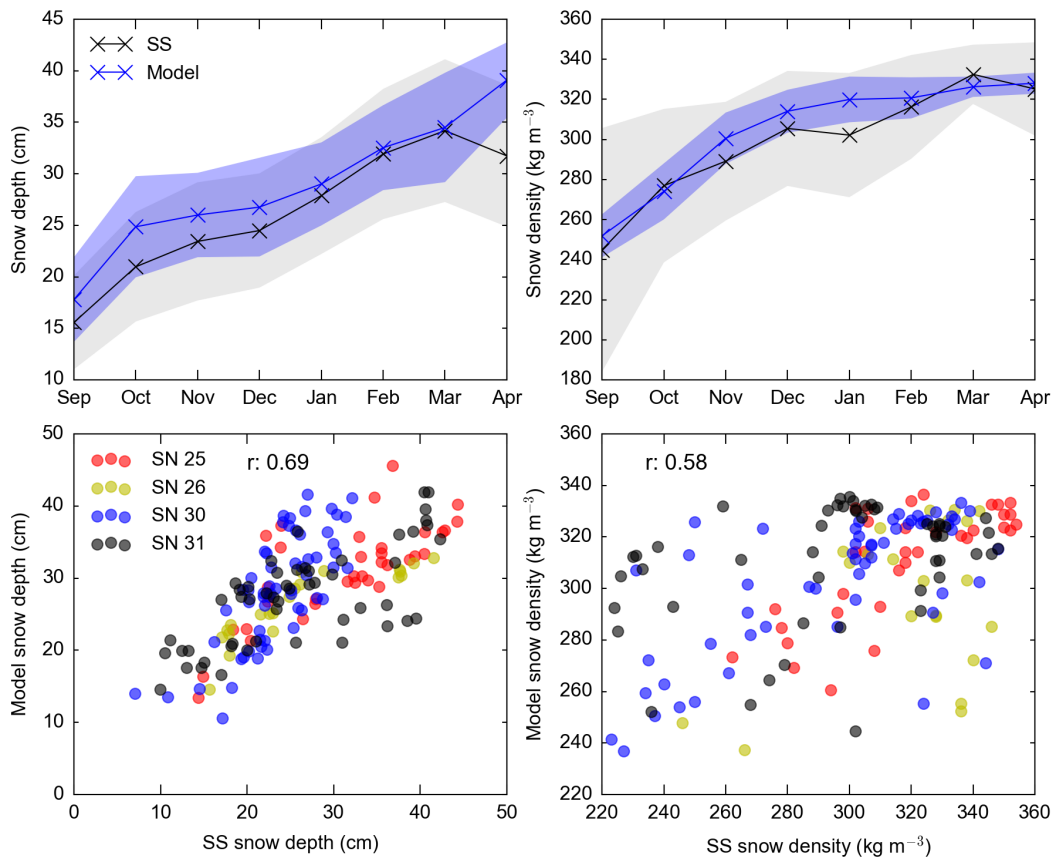

**Figure S2:** As in Figure 5 but for NESOSIM forced by the JRA-55 snowfall data.

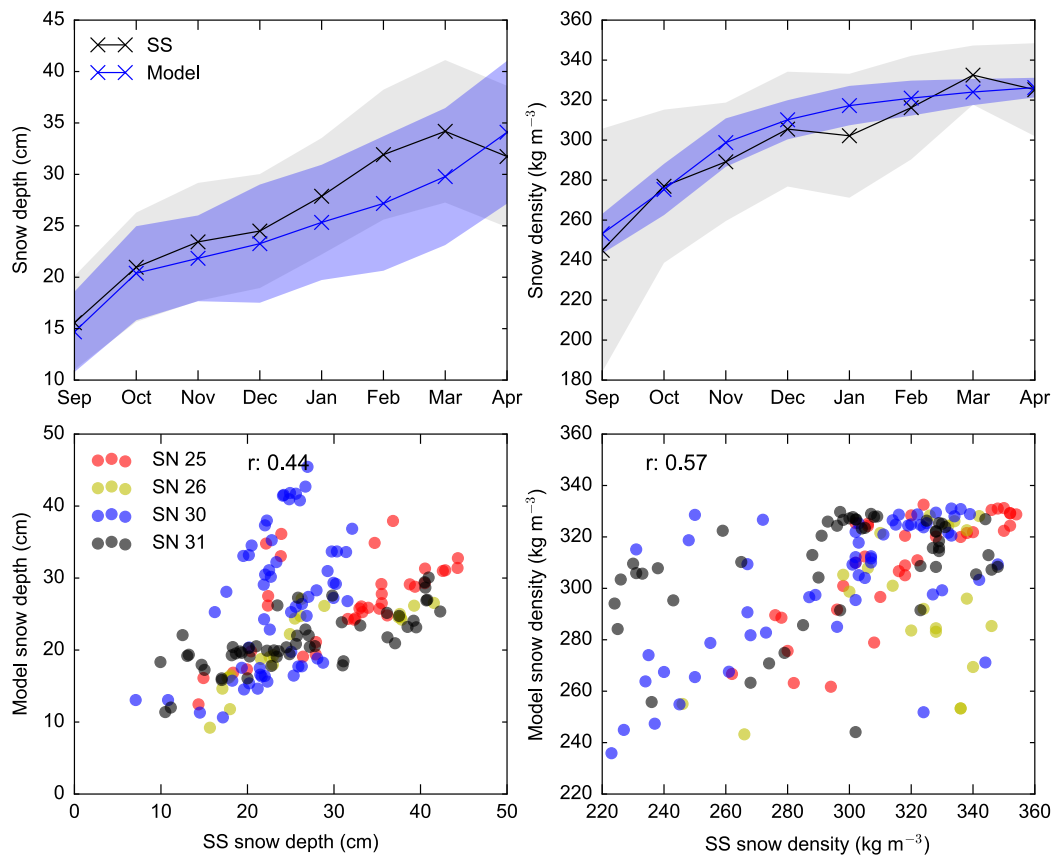

**Figure S3:** As in Figure 5 but for NESOSIM forced by the MERRA snowfall data.

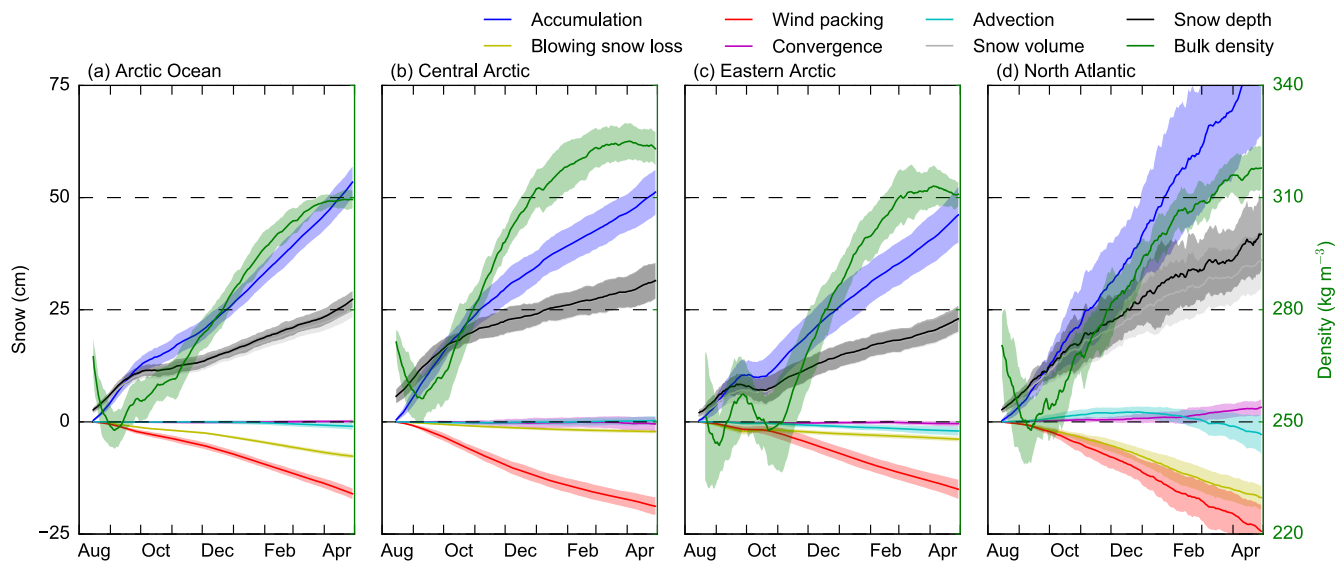

**Figure S4:** As in Figure 8 but for the regional snow depth/density results initiated on August 15th 2000-2014.

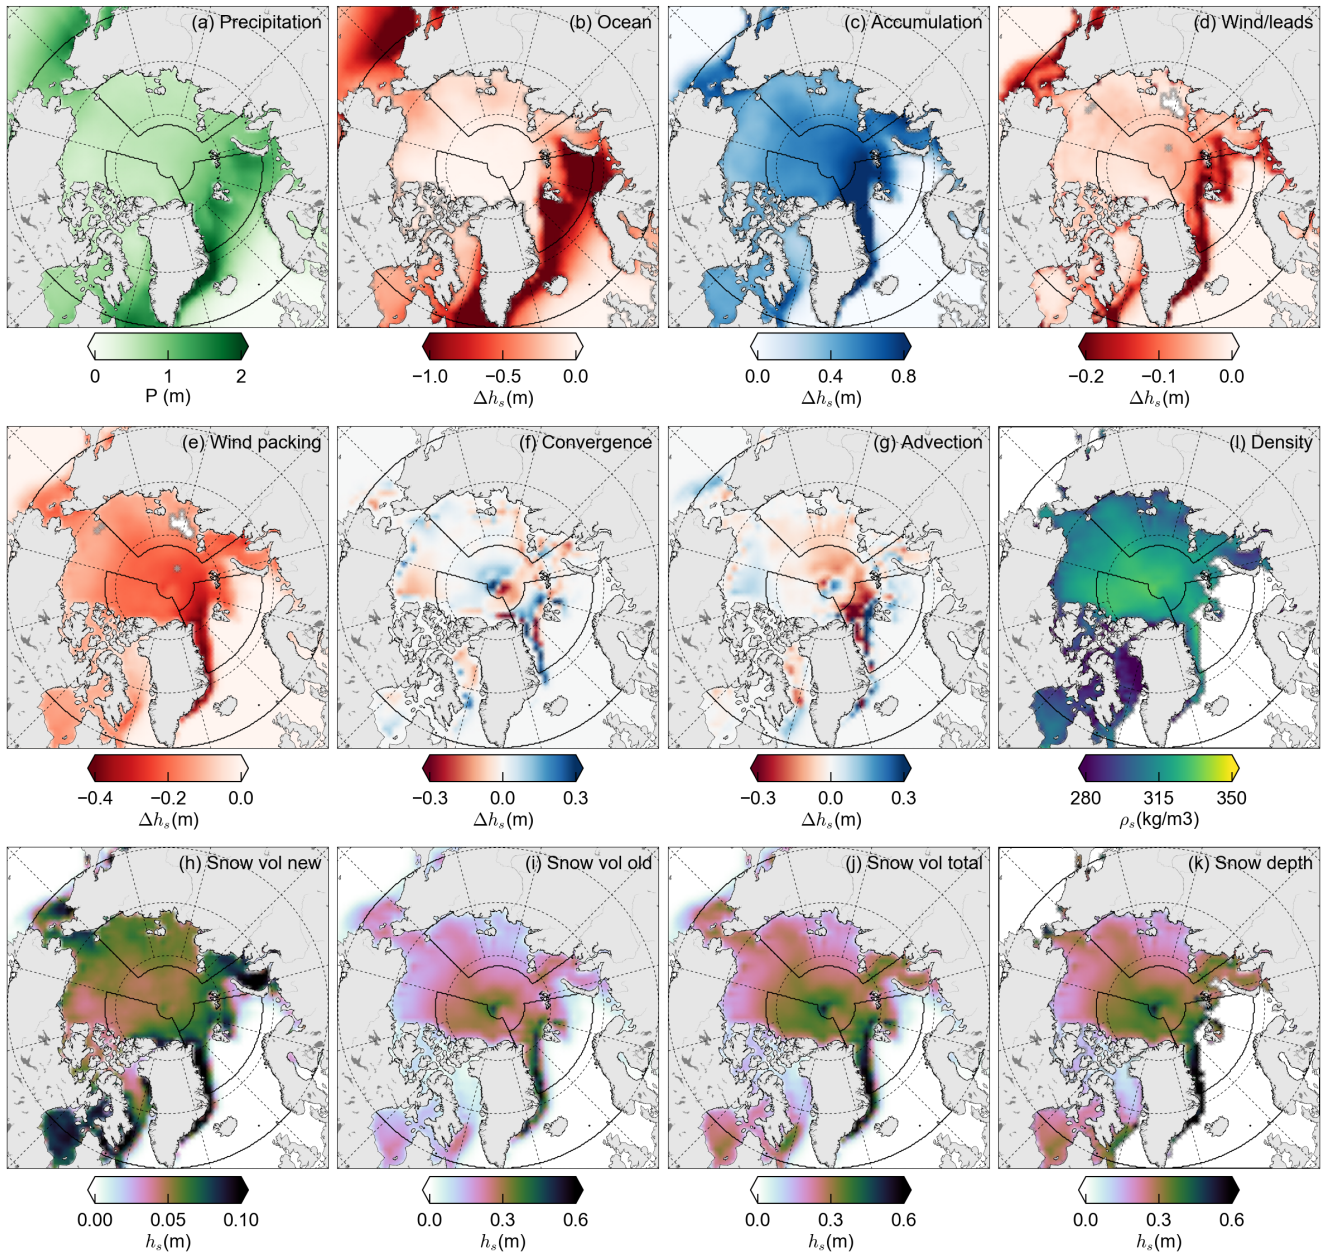

**Figure S5:** As in Figure 9 but for the 2001-2015 May 1st mean budget terms.

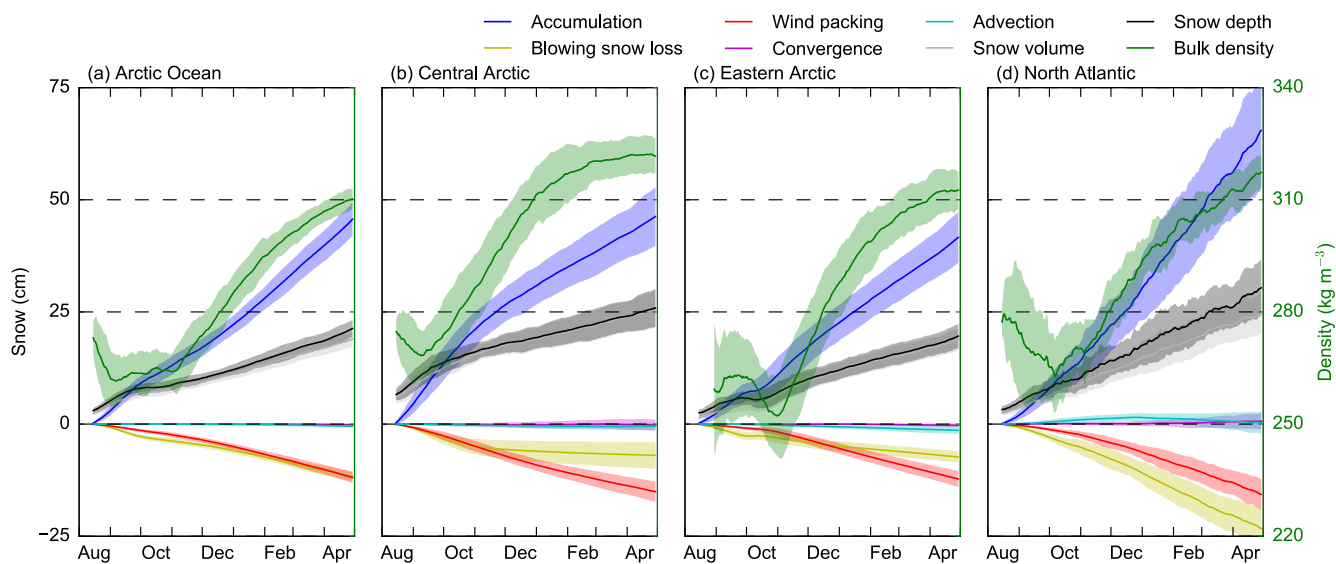

**Figure S6:** As in Figure 8 but for the default/ERA-I NESOSIM simulations forced with the NASA Team ice concentration data.
